# Supplementary material
Source: PubMed Central journal article supplement (PMC4947520)
Supplement: NIHMS754265-supplement-1.pdf [file NIHMS754265-supplement-1.pdf]

Supplementary Table 1.

Mean Asymmetry Coefficients, Univariate t-value and FDR-corrected p value, by FreeSurfer Parcellation

| Parcellation Number | Parcellation Name         | Surface Area Asymmetry |               |                | Cortical Thickness Asymmetry |               |                | Local Gyrfication Asymmetry |               |                |
|---------------------|---------------------------|------------------------|---------------|----------------|------------------------------|---------------|----------------|-----------------------------|---------------|----------------|
|                     |                           | Mean                   | T Value       | P Value        | Mean                         | T Value       | P Value        | Mean                        | T Value       | P Value        |
| 1                   | asy_GS_frontomargin       | <b>0.169</b>           | <b>15.54</b>  | <b>0.00000</b> | <b>-0.042</b>                | <b>-5.83</b>  | <b>0.00000</b> | <b>0.014</b>                | <b>4.36</b>   | <b>0.00004</b> |
| 2                   | asy_GS_occipital_inf      | <b>0.201</b>           | <b>12.67</b>  | <b>0.00000</b> | <b>-0.073</b>                | <b>-11.82</b> | <b>0.00000</b> | -0.005                      | -1.22         | 0.29445        |
| 3                   | asy_GS_paracentral        | <b>0.088</b>           | <b>7.89</b>   | <b>0.00000</b> | 0.007                        | 1.39          | 0.19561        | -0.005                      | -1.65         | 0.15213        |
| 4                   | asy_GS_subcentral         | <b>0.129</b>           | <b>12.93</b>  | <b>0.00000</b> | <b>-0.025</b>                | <b>-4.67</b>  | <b>0.00001</b> | 0.000                       | -0.09         | 0.94091        |
| 6                   | asy_GS_cingul-Ant         | <b>-0.188</b>          | <b>-28.20</b> | <b>0.00000</b> | <b>0.023</b>                 | <b>4.30</b>   | <b>0.00005</b> | <b>-0.035</b>               | <b>-15.48</b> | <b>0.00000</b> |
| 7                   | asy_GS_cingul-Mid-Ant     | <b>-0.101</b>          | <b>-9.69</b>  | <b>0.00000</b> | <b>-0.024</b>                | <b>-5.07</b>  | <b>0.00000</b> | <b>-0.032</b>               | <b>-10.99</b> | <b>0.00000</b> |
| 8                   | asy_GS_cingul-Mid-Post    | <b>-0.083</b>          | <b>-9.63</b>  | <b>0.00000</b> | 0.003                        | 0.60          | 0.57238        | 0.002                       | 0.69          | 0.54939        |
| 9                   | asy_G_cingul-Post-dorsal  | <b>0.053</b>           | <b>3.45</b>   | <b>0.00081</b> | <b>0.018</b>                 | <b>3.67</b>   | <b>0.00052</b> | <b>-0.014</b>               | <b>-3.32</b>  | <b>0.00187</b> |
| 10                  | asy_G_cingul-Post-ventral | <b>0.097</b>           | <b>5.40</b>   | <b>0.00000</b> | <b>-0.140</b>                | <b>-16.13</b> | <b>0.00000</b> | <b>-0.062</b>               | <b>-13.27</b> | <b>0.00000</b> |
| 11                  | asy_G_cuneus              | <b>-0.039</b>          | <b>-3.61</b>  | <b>0.00047</b> | <b>-0.025</b>                | <b>-5.65</b>  | <b>0.00000</b> | <b>-0.073</b>               | <b>-16.18</b> | <b>0.00000</b> |
| 12                  | asy_G_front_inf-Opercular | <b>0.128</b>           | <b>10.41</b>  | <b>0.00000</b> | <b>-0.025</b>                | <b>-5.86</b>  | <b>0.00000</b> | <b>-0.014</b>               | <b>-2.80</b>  | <b>0.00929</b> |
| 14                  | asy_G_front_inf-Triangul  | <b>0.044</b>           | <b>2.79</b>   | <b>0.00671</b> | <b>-0.036</b>                | <b>-7.70</b>  | <b>0.00000</b> | <b>0.013</b>                | <b>2.42</b>   | <b>0.02612</b> |
| 15                  | asy_G_front_middle        | <b>0.103</b>           | <b>12.04</b>  | <b>0.00000</b> | <b>-0.011</b>                | <b>-3.98</b>  | <b>0.00019</b> | 0.004                       | 1.49          | 0.19579        |
| 16                  | asy_G_front_sup           | <b>0.050</b>           | <b>8.76</b>   | <b>0.00000</b> | <b>0.020</b>                 | <b>9.15</b>   | <b>0.00000</b> | <b>-0.031</b>               | <b>-13.97</b> | <b>0.00000</b> |
| 17                  | asy_G_Ins_lgS_cent_ins    | <b>-0.030</b>          | <b>-2.43</b>  | <b>0.01770</b> | <b>-0.025</b>                | <b>-3.68</b>  | <b>0.00051</b> | 0.002                       | 0.34          | 0.79288        |
| 18                  | asy_G_insular_short       | <b>0.092</b>           | <b>8.07</b>   | <b>0.00000</b> | 0.009                        | 1.83          | 0.09101        | 0.006                       | 1.17          | 0.30816        |
| 19                  | asy_G_occipital_middle    | <b>-0.061</b>          | <b>-5.56</b>  | <b>0.00000</b> | <b>-0.036</b>                | <b>-9.42</b>  | <b>0.00000</b> | 0.006                       | 1.35          | 0.23752        |
| 20                  | asy_G_occipital_sup       | <b>-0.106</b>          | <b>-10.11</b> | <b>0.00000</b> | <b>-0.013</b>                | <b>-2.84</b>  | <b>0.00726</b> | <b>-0.049</b>               | <b>-12.31</b> | <b>0.00000</b> |
| 21                  | asy_G_oc-temp_lat-fusifor | -0.005                 | -0.31         | 0.75411        | 0.000                        | 0.05          | 0.96343        | <b>0.029</b>                | <b>10.44</b>  | <b>0.00000</b> |
| 22                  | asy_G_oc-temp_med-Lingual | <b>0.088</b>           | <b>9.65</b>   | <b>0.00000</b> | <b>-0.053</b>                | <b>-12.99</b> | <b>0.00000</b> | <b>-0.048</b>               | <b>-12.35</b> | <b>0.00000</b> |
| 23                  | asy_G_oc-temp_med-Parahip | <b>-0.128</b>          | <b>-11.67</b> | <b>0.00000</b> | <b>-0.020</b>                | <b>-3.91</b>  | <b>0.00024</b> | <b>0.018</b>                | <b>5.85</b>   | <b>0.00000</b> |
| 24                  | asy_G_orbital             | <b>-0.058</b>          | <b>-10.07</b> | <b>0.00000</b> | <b>-0.012</b>                | <b>-3.37</b>  | <b>0.00139</b> | 0.005                       | 1.58          | 0.16718        |
| 25                  | asy_G_pariet_inf-Angular  | <b>-0.168</b>          | <b>-14.39</b> | <b>0.00000</b> | <b>-0.021</b>                | <b>-5.79</b>  | <b>0.00000</b> | 0.001                       | 0.32          | 0.79529        |
| 26                  | asy_G_pariet_inf-Supramar | <b>0.093</b>           | <b>9.09</b>   | <b>0.00000</b> | <b>-0.028</b>                | <b>-7.54</b>  | <b>0.00000</b> | <b>0.018</b>                | <b>5.64</b>   | <b>0.00000</b> |
| 27                  | asy_G_parietal_sup        | <b>0.196</b>           | <b>18.23</b>  | <b>0.00000</b> | 0.006                        | 1.85          | 0.08906        | 0.002                       | 0.83          | 0.47087        |
| 28                  | asy_G_postcentral         | <b>0.104</b>           | <b>12.06</b>  | <b>0.00000</b> | 0.008                        | 1.95          | 0.07323        | <b>0.012</b>                | <b>4.63</b>   | <b>0.00001</b> |
| 29                  | asy_G_precentral          | 0.013                  | 1.57          | 0.12379        | -0.004                       | -1.06         | 0.31369        | <b>0.012</b>                | <b>4.28</b>   | <b>0.00006</b> |
| 30                  | asy_G_precuneus           | 0.004                  | 0.37          | 0.72552        | <b>0.013</b>                 | <b>3.50</b>   | <b>0.00089</b> | <b>-0.033</b>               | <b>-9.76</b>  | <b>0.00000</b> |
| 31                  | asy_G_rectus              | <b>0.320</b>           | <b>32.93</b>  | <b>0.00000</b> | <b>0.066</b>                 | <b>10.33</b>  | <b>0.00000</b> | <b>-0.033</b>               | <b>-11.40</b> | <b>0.00000</b> |
| 33                  | asy_G_temp_sup-G_T_transv | <b>0.293</b>           | <b>19.25</b>  | <b>0.00000</b> | <b>-0.025</b>                | <b>-3.79</b>  | <b>0.00037</b> | 0.001                       | 0.26          | 0.81625        |
| 34                  | asy_G_temp_sup-Lateral    | <b>0.114</b>           | <b>14.82</b>  | <b>0.00000</b> | <b>-0.038</b>                | <b>-8.88</b>  | <b>0.00000</b> | 0.003                       | 0.83          | 0.47087        |
| 35                  | asy_G_temp_sup-Plan_polar | <b>-0.082</b>          | <b>-5.15</b>  | <b>0.00000</b> | <b>0.024</b>                 | <b>3.78</b>   | <b>0.00037</b> | <b>-0.048</b>               | <b>-6.45</b>  | <b>0.00000</b> |
| 36                  | asy_G_temp_sup-Plan_tempo | <b>0.176</b>           | <b>11.41</b>  | <b>0.00000</b> | <b>-0.041</b>                | <b>-5.72</b>  | <b>0.00000</b> | <b>-0.014</b>               | <b>-3.32</b>  | <b>0.00187</b> |
| 37                  | asy_G_temporal_inf        | <b>0.110</b>           | <b>10.09</b>  | <b>0.00000</b> | <b>-0.016</b>                | <b>-4.33</b>  | <b>0.00005</b> | <b>0.045</b>                | <b>13.29</b>  | <b>0.00000</b> |
| 38                  | asy_G_temporal_middle     | <b>-0.050</b>          | <b>-5.80</b>  | <b>0.00000</b> | <b>-0.045</b>                | <b>-11.22</b> | <b>0.00000</b> | <b>0.037</b>                | <b>9.23</b>   | <b>0.00000</b> |
| 39                  | asy_Lat_Fis-ant-Horizont  | <b>-0.211</b>          | <b>-12.51</b> | <b>0.00000</b> | -0.020                       | -1.74         | 0.10687        | <b>-0.028</b>               | <b>-4.19</b>  | <b>0.00008</b> |

Supplementary Table 1.

Mean Asymmetry Coefficients, Univariate t-value and FDR-corrected p value, by FreeSurfer Parcellation

|    |                           |               |               |                |  |               |               |                |  |               |               |                |
|----|---------------------------|---------------|---------------|----------------|--|---------------|---------------|----------------|--|---------------|---------------|----------------|
| 40 | asy_Lat_Fis-ant-Vertical  | <b>0.263</b>  | <b>9.13</b>   | <b>0.00000</b> |  | <b>-0.072</b> | <b>-6.77</b>  | <b>0.00000</b> |  | 0.006         | 1.06          | 0.35016        |
| 41 | asy_Lat_Fis-post          | <b>-0.188</b> | <b>-21.50</b> | <b>0.00000</b> |  | <b>-0.062</b> | <b>-10.83</b> | <b>0.00000</b> |  | <b>-0.032</b> | <b>-7.75</b>  | <b>0.00000</b> |
| 42 | asy_Pole_occipital        | <b>-0.386</b> | <b>-42.65</b> | <b>0.00000</b> |  | 0.006         | 1.25          | 0.23910        |  | <b>-0.019</b> | <b>-4.91</b>  | <b>0.00000</b> |
| 43 | asy_Pole_temporal         | <b>0.057</b>  | <b>8.23</b>   | <b>0.00000</b> |  | <b>-0.021</b> | <b>-4.65</b>  | <b>0.00001</b> |  | <b>0.012</b>  | <b>3.02</b>   | <b>0.00484</b> |
| 44 | asy_S_calcarine           | <b>0.059</b>  | <b>8.25</b>   | <b>0.00000</b> |  | <b>-0.029</b> | <b>-6.16</b>  | <b>0.00000</b> |  | <b>-0.056</b> | <b>-15.35</b> | <b>0.00000</b> |
| 45 | asy_S_central             | <b>0.013</b>  | <b>2.71</b>   | <b>0.00824</b> |  | <b>0.017</b>  | <b>4.63</b>   | <b>0.00001</b> |  | <b>0.019</b>  | <b>7.04</b>   | <b>0.00000</b> |
| 46 | asy_S_cingul-Marginalis   | <b>-0.160</b> | <b>-15.22</b> | <b>0.00000</b> |  | 0.005         | 0.85          | 0.41976        |  | <b>-0.012</b> | <b>-3.65</b>  | <b>0.00063</b> |
| 47 | asy_S_circular_insula_ant | <b>-0.163</b> | <b>-13.24</b> | <b>0.00000</b> |  | <b>-0.049</b> | <b>-6.83</b>  | <b>0.00000</b> |  | <b>0.037</b>  | <b>5.74</b>   | <b>0.00000</b> |
| 48 | asy_S_circular_insula_inf | <b>0.154</b>  | <b>23.04</b>  | <b>0.00000</b> |  | <b>0.012</b>  | <b>2.30</b>   | <b>0.03200</b> |  | 0.004         | 0.93          | 0.42000        |
| 49 | asy_S_circular_insula_sup | <b>0.242</b>  | <b>38.88</b>  | <b>0.00000</b> |  | <b>-0.057</b> | <b>-14.10</b> | <b>0.00000</b> |  | -0.001        | -0.30         | 0.79908        |
| 50 | asy_S_collat_transv_ant   | <b>-0.032</b> | <b>-2.05</b>  | <b>0.04480</b> |  | -0.004        | -0.43         | 0.67944        |  | <b>0.038</b>  | <b>10.41</b>  | <b>0.00000</b> |
| 51 | asy_S_collat_transv_post  | <b>-0.279</b> | <b>-11.14</b> | <b>0.00000</b> |  | -0.014        | -1.76         | 0.10491        |  | <b>0.011</b>  | <b>2.62</b>   | <b>0.01554</b> |
| 52 | asy_S_front_inf           | <b>0.094</b>  | <b>7.45</b>   | <b>0.00000</b> |  | <b>-0.042</b> | <b>-10.04</b> | <b>0.00000</b> |  | <b>0.020</b>  | <b>5.09</b>   | <b>0.00000</b> |
| 53 | asy_S_front_middle        | <b>-0.342</b> | <b>-20.74</b> | <b>0.00000</b> |  | -0.003        | -0.53         | 0.61231        |  | <b>-0.014</b> | <b>-3.43</b>  | <b>0.00137</b> |
| 54 | asy_S_front_sup           | <b>0.071</b>  | <b>7.40</b>   | <b>0.00000</b> |  | -0.004        | -1.23         | 0.24266        |  | 0.000         | 0.07          | 0.94091        |
| 56 | asy_S_intraparietP_trans  | <b>-0.026</b> | <b>-2.36</b>  | <b>0.02095</b> |  | -0.006        | -1.56         | 0.14506        |  | 0.002         | 0.69          | 0.54939        |
| 57 | asy_S_oc_middleLunatus    | <b>0.078</b>  | <b>4.11</b>   | <b>0.00007</b> |  | <b>-0.054</b> | <b>-7.35</b>  | <b>0.00000</b> |  | 0.008         | 1.61          | 0.16016        |
| 58 | asy_S_oc_suptransversal   | <b>-0.184</b> | <b>-11.41</b> | <b>0.00000</b> |  | -0.008        | -1.55         | 0.14506        |  | <b>-0.010</b> | <b>-2.41</b>  | <b>0.02612</b> |
| 60 | asy_S_oc-temp_lat         | 0.023         | 1.29          | 0.20345        |  | <b>-0.023</b> | <b>-3.19</b>  | <b>0.00254</b> |  | <b>0.043</b>  | <b>11.76</b>  | <b>0.00000</b> |
| 61 | asy_S_oc-temp_medLingual  | <b>0.076</b>  | <b>8.43</b>   | <b>0.00000</b> |  | 0.009         | 1.64          | 0.12808        |  | 0.004         | 1.10          | 0.33467        |
| 62 | asy_S_orbital_lateral     | <b>-0.091</b> | <b>-4.11</b>  | <b>0.00007</b> |  | <b>-0.033</b> | <b>-2.84</b>  | <b>0.00726</b> |  | -0.008        | -1.38         | 0.22880        |
| 63 | asy_S_orbital_med-olfact  | <b>-0.058</b> | <b>-4.47</b>  | <b>0.00002</b> |  | <b>0.094</b>  | <b>10.22</b>  | <b>0.00000</b> |  | -0.002        | -0.51         | 0.67138        |
| 64 | asy_S_orbital-H_Shaped    | <b>-0.077</b> | <b>-8.70</b>  | <b>0.00000</b> |  | <b>-0.024</b> | <b>-3.69</b>  | <b>0.00050</b> |  | <b>0.018</b>  | <b>5.06</b>   | <b>0.00000</b> |
| 65 | asy_S_parieto_occipital   | <b>-0.080</b> | <b>-7.13</b>  | <b>0.00000</b> |  | <b>-0.018</b> | <b>-3.66</b>  | <b>0.00053</b> |  | <b>-0.052</b> | <b>-14.50</b> | <b>0.00000</b> |
| 66 | asy_S_pericallosal        | <b>-0.344</b> | <b>-26.45</b> | <b>0.00000</b> |  | <b>0.039</b>  | <b>4.53</b>   | <b>0.00002</b> |  | <b>-0.015</b> | <b>-4.68</b>  | <b>0.00001</b> |
| 67 | asy_S_postcentral         | <b>0.165</b>  | <b>15.79</b>  | <b>0.00000</b> |  | -0.006        | -1.33         | 0.21375        |  | <b>0.015</b>  | <b>5.70</b>   | <b>0.00000</b> |
| 68 | asy_S_precentral-inf-part | <b>-0.110</b> | <b>-7.74</b>  | <b>0.00000</b> |  | <b>-0.041</b> | <b>-8.68</b>  | <b>0.00000</b> |  | <b>0.023</b>  | <b>5.06</b>   | <b>0.00000</b> |
| 69 | asy_S_precentral-sup-part | <b>-0.037</b> | <b>-2.59</b>  | <b>0.01149</b> |  | -0.006        | -1.23         | 0.24266        |  | 0.006         | 1.45          | 0.20462        |
| 71 | asy_S_subparietal         | <b>-0.093</b> | <b>-5.63</b>  | <b>0.00000</b> |  | 0.010         | 1.70          | 0.11529        |  | <b>-0.038</b> | <b>-8.37</b>  | <b>0.00000</b> |
| 72 | asy_S_temporal_inf        | <b>0.135</b>  | <b>7.98</b>   | <b>0.00000</b> |  | <b>-0.057</b> | <b>-7.65</b>  | <b>0.00000</b> |  | <b>0.042</b>  | <b>9.61</b>   | <b>0.00000</b> |
| 73 | asy_S_temporal_sup        | <b>-0.085</b> | <b>-11.41</b> | <b>0.00000</b> |  | <b>-0.062</b> | <b>-18.34</b> | <b>0.00000</b> |  | <b>0.020</b>  | <b>6.11</b>   | <b>0.00000</b> |
| 74 | asy_S_temporal_transverse | <b>0.189</b>  | <b>9.45</b>   | <b>0.00000</b> |  | <b>-0.106</b> | <b>-9.60</b>  | <b>0.00000</b> |  | -0.005        | -1.17         | 0.30816        |
