# Supplementary material
Source: PubMed Central journal article supplement (PMC4947520)
Supplement: NIHMS754265-supplement-2.pdf [file NIHMS754265-supplement-2.pdf]

Supplementary Table 2. Correlation Coefficients and FDR-corrected p value for Cross-metric Asymmetry Correlations, by FreeSurfer Parcellation

| Parcellation Number | Parcellation Name         | Surface Area x LGI |                | Surface Area x Thickness |                | LGI x Thickness |                |
|---------------------|---------------------------|--------------------|----------------|--------------------------|----------------|-----------------|----------------|
|                     |                           | R Value            | FDR p          | R Value                  | FDR p          | R Value         | FDR p          |
| 1                   | asy_GS_frontomargin       | <b>0.277</b>       | <b>0.00073</b> | -0.075                   | 0.39813        | <b>-0.265</b>   | <b>0.00085</b> |
| 2                   | asy_GS_occipital_inf      | -0.058             | 0.54867        | 0.135                    | 0.12852        | -0.074          | 0.37375        |
| 3                   | asy_GS_paracentral        | 0.006              | 0.96002        | 0.073                    | 0.39858        | <b>-0.262</b>   | <b>0.00085</b> |
| 4                   | asy_GS_subcentral         | -0.146             | 0.11022        | <b>-0.191</b>            | <b>0.02299</b> | 0.010           | 0.94988        |
| 6                   | asy_GS_cingul-Ant         | 0.114              | 0.21840        | <b>-0.191</b>            | <b>0.02299</b> | <b>-0.477</b>   | <b>0.00000</b> |
| 7                   | asy_GS_cingul-Mid-Ant     | 0.047              | 0.65344        | -0.037                   | 0.72116        | <b>-0.359</b>   | <b>0.00001</b> |
| 8                   | asy_GS_cingul-Mid-Post    | 0.023              | 0.84467        | -0.038                   | 0.71898        | <b>-0.301</b>   | <b>0.00011</b> |
| 9                   | asy_G_cingul-Post-dorsal  | 0.170              | 0.06800        | -0.116                   | 0.17732        | -0.081          | 0.33294        |
| 10                  | asy_G_cingul-Post-ventral | 0.010              | 0.93432        | <b>-0.238</b>            | <b>0.00397</b> | <b>0.168</b>    | <b>0.04201</b> |
| 11                  | asy_G_cuneus              | -0.036             | 0.72619        | <b>-0.174</b>            | <b>0.03853</b> | -0.132          | 0.11862        |
| 12                  | asy_G_front_inf-Opercular | -0.130             | 0.15028        | <b>-0.381</b>            | <b>0.00000</b> | -0.019          | 0.85173        |
| 14                  | asy_G_front_inf-Triangul  | 0.081              | 0.41162        | <b>-0.198</b>            | <b>0.01851</b> | -0.004          | 0.97730        |
| 15                  | asy_G_front_middle        | -0.011             | 0.92693        | <b>-0.214</b>            | <b>0.01063</b> | <b>-0.348</b>   | <b>0.00001</b> |
| 16                  | asy_G_front_sup           | 0.146              | 0.11022        | <b>-0.353</b>            | <b>0.00000</b> | <b>-0.203</b>   | <b>0.01088</b> |
| 17                  | asy_G_Ins_lgS_cent_ins    | 0.138              | 0.12653        | <b>-0.262</b>            | <b>0.00170</b> | -0.082          | 0.32947        |
| 18                  | asy_G_insular_short       | 0.063              | 0.52069        | <b>-0.432</b>            | <b>0.00000</b> | -0.006          | 0.97730        |
| 19                  | asy_G_occipital_middle    | 0.078              | 0.41162        | -0.162                   | 0.05675        | -0.037          | 0.67909        |
| 20                  | asy_G_occipital_sup       | -0.029             | 0.79295        | -0.009                   | 0.91729        | <b>-0.259</b>   | <b>0.00085</b> |
| 21                  | asy_G_oc-temp_lat-fusifor | 0.076              | 0.41162        | <b>-0.239</b>            | <b>0.00397</b> | -0.126          | 0.11496        |
| 22                  | asy_G_oc-temp_med-Lingual | 0.039              | 0.72619        | <b>-0.239</b>            | <b>0.00397</b> | -0.113          | 0.17810        |
| 23                  | asy_G_oc-temp_med-Parahip | <b>-0.216</b>      | <b>0.01428</b> | 0.074                    | 0.39813        | -0.110          | 0.19151        |
| 24                  | asy_G_orbital             | 0.145              | 0.11070        | <b>-0.213</b>            | <b>0.01063</b> | -0.115          | 0.17398        |
| 25                  | asy_G_pariet_inf-Angular  | -0.099             | 0.28386        | -0.016                   | 0.87040        | <b>-0.293</b>   | <b>0.00018</b> |
| 26                  | asy_G_pariet_inf-Supramar | -0.106             | 0.24976        | <b>-0.226</b>            | <b>0.00680</b> | -0.131          | 0.11928        |
| 27                  | asy_G_parietal_sup        | <b>0.203</b>       | <b>0.01943</b> | <b>-0.178</b>            | <b>0.03518</b> | <b>-0.209</b>   | <b>0.00917</b> |
| 28                  | asy_G_postcentral         | 0.095              | 0.29920        | <b>0.200</b>             | <b>0.01840</b> | 0.075           | 0.37182        |
| 29                  | asy_G_precentral          | 0.108              | 0.24480        | <b>-0.441</b>            | <b>0.00000</b> | -0.106          | 0.19677        |
| 30                  | asy_G_precuneus           | -0.016             | 0.90703        | <b>-0.305</b>            | <b>0.00014</b> | <b>-0.179</b>   | <b>0.02821</b> |
| 31                  | asy_G_rectus              | 0.035              | 0.72619        | <b>-0.217</b>            | <b>0.00971</b> | -0.095          | 0.25528        |
| 33                  | asy_G_temp_sup-G_T_transv | -0.160             | 0.08661        | -0.023                   | 0.81644        | <b>-0.225</b>   | <b>0.00476</b> |
| 34                  | asy_G_temp_sup-Lateral    | -0.159             | 0.08661        | 0.009                    | 0.91729        | -0.135          | 0.11520        |
| 35                  | asy_G_temp_sup-Plan_polar | <b>0.497</b>       | <b>0.00000</b> | <b>-0.419</b>            | <b>0.00000</b> | <b>-0.322</b>   | <b>0.00004</b> |
| 36                  | asy_G_temp_sup-Plan_tempo | -0.139             | 0.12467        | 0.112                    | 0.18725        | -0.133          | 0.11862        |
| 37                  | asy_G_temporal_inf        | <b>0.347</b>       | <b>0.00002</b> | -0.076                   | 0.39813        | -0.139          | 0.10748        |
| 38                  | asy_G_temporal_middle     | 0.047              | 0.65344        | -0.086                   | 0.33734        | <b>-0.228</b>   | <b>0.00453</b> |
| 39                  | asy_Lat_Fis-ant-Horizont  | -0.071             | 0.45022        | -0.127                   | 0.15104        | <b>0.259</b>    | <b>0.00085</b> |
| 40                  | asy_Lat_Fis-ant-Vertical  | 0.148              | 0.11022        | -0.130                   | 0.14004        | <b>-0.213</b>   | <b>0.00773</b> |
| 41                  | asy_Lat_Fis-post          | -0.153             | 0.10006        | -0.011                   | 0.91729        | -0.002          | 0.97730        |
| 42                  | asy_Pole_occipital        | -0.012             | 0.92693        | -0.156                   | 0.06901        | -0.064          | 0.44618        |
| 43                  | asy_Pole_temporal         | 0.097              | 0.29495        | -0.138                   | 0.12217        | <b>-0.277</b>   | <b>0.00040</b> |
| 44                  | asy_S_calcarine           | <b>0.279</b>       | <b>0.00073</b> | -0.119                   | 0.17018        | -0.026          | 0.80195        |
| 45                  | asy_S_central             | <b>0.179</b>       | <b>0.05077</b> | 0.148                    | 0.08840        | -0.020          | 0.85173        |
| 46                  | asy_S_cingul-Marginalis   | <b>0.302</b>       | <b>0.00022</b> | 0.116                    | 0.17732        | -0.106          | 0.19677        |
| 47                  | asy_S_circular_insula_ant | 0.077              | 0.41162        | -0.092                   | 0.30260        | -0.088          | 0.29226        |
| 48                  | asy_S_circular_insula_inf | -0.121             | 0.18530        | 0.098                    | 0.26378        | -0.049          | 0.58058        |
| 49                  | asy_S_circular_insula_sup | 0.001              | 0.99200        | 0.066                    | 0.44288        | 0.043           | 0.62560        |
| 50                  | asy_S_collat_transv_ant   | 0.101              | 0.27397        | <b>-0.187</b>            | <b>0.02442</b> | <b>-0.224</b>   | <b>0.00476</b> |
| 51                  | asy_S_collat_transv_post  | 0.041              | 0.70581        | -0.084                   | 0.33928        | -0.116          | 0.17102        |
| 52                  | asy_S_front_inf           | -0.161             | 0.08661        | 0.033                    | 0.73763        | -0.117          | 0.17102        |
| 53                  | asy_S_front_middle        | <b>0.276</b>       | <b>0.00073</b> | 0.034                    | 0.73763        | <b>-0.288</b>   | <b>0.00023</b> |
| 54                  | asy_S_front_sup           | <b>0.236</b>       | <b>0.00680</b> | -0.074                   | 0.39813        | <b>-0.203</b>   | <b>0.01088</b> |
| 56                  | asy_S_intraparietP_trans  | 0.110              | 0.23761        | -0.018                   | 0.86554        | -0.123          | 0.14817        |
| 57                  | asy_S_oc_middleLunatus    | <b>0.319</b>       | <b>0.00009</b> | <b>-0.190</b>            | <b>0.02299</b> | -0.149          | 0.08207        |
| 58                  | asy_S_oc_suptransversal   | 0.061              | 0.52931        | -0.003                   | 0.97050        | -0.107          | 0.19677        |
| 60                  | asy_S_oc-temp_lat         | <b>0.207</b>       | <b>0.01870</b> | <b>-0.272</b>            | <b>0.00092</b> | <b>-0.333</b>   | <b>0.00002</b> |
| 61                  | asy_S_oc-temp_medLingual  | 0.114              | 0.21840        | <b>-0.243</b>            | <b>0.00378</b> | <b>-0.241</b>   | <b>0.00240</b> |
| 62                  | asy_S_orbital_lateral     | -0.140             | 0.12467        | -0.114                   | 0.18411        | -0.003          | 0.97730        |
| 63                  | asy_S_orbital_med-olfact  | 0.121              | 0.18530        | 0.119                    | 0.17018        | 0.135           | 0.11520        |
| 64                  | asy_S_orbital-H_Shaped    | -0.005             | 0.96002        | -0.106                   | 0.22149        | <b>-0.319</b>   | <b>0.00005</b> |
| 65                  | asy_S_parieto_occipital   | <b>0.207</b>       | <b>0.01870</b> | 0.045                    | 0.64600        | <b>-0.217</b>   | <b>0.00648</b> |
| 66                  | asy_S_pericallosal        | -0.078             | 0.41162        | <b>-0.170</b>            | <b>0.04352</b> | <b>-0.307</b>   | <b>0.00009</b> |
| 67                  | asy_S_postcentral         | 0.076              | 0.41162        | 0.130                    | 0.14004        | -0.068          | 0.41455        |
| 68                  | asy_S_precentral-inf-part | <b>-0.220</b>      | <b>0.01284</b> | -0.068                   | 0.43366        | 0.089           | 0.29226        |
| 69                  | asy_S_precentral-sup-part | 0.155              | 0.09724        | -0.031                   | 0.74755        | 0.062           | 0.44618        |
| 71                  | asy_S_subparietal         | -0.136             | 0.12920        | -0.120                   | 0.17018        | <b>-0.184</b>   | <b>0.02354</b> |
| 72                  | asy_S_temporal_inf        | <b>0.203</b>       | <b>0.01943</b> | -0.119                   | 0.17018        | -0.141          | 0.10472        |
| 73                  | asy_S_temporal_sup        | -0.036             | 0.72619        | 0.029                    | 0.76628        | <b>-0.316</b>   | <b>0.00005</b> |
| 74                  | asy_S_temporal_transverse | -0.019             | 0.88043        | -0.089                   | 0.31386        | -0.106          | 0.19677        |
