# Supplementary material
Source: PubMed Central journal article supplement (PMC4947520)
Supplement: NIHMS754265-supplement-3.pdf [file NIHMS754265-supplement-3.pdf]

| Parcellation Number | Parcellation Name     | Surface Area CV |       | Cortical Thickness CV |       | Local Gyrfication CV |      |
|---------------------|-----------------------|-----------------|-------|-----------------------|-------|----------------------|------|
|                     |                       | LH              | RH    | LH                    | RH    | LH                   | RH   |
| 1                   | GS_frontomargin       | 15.84           | 15.65 | 8.80                  | 8.23  | 4.86                 | 5.53 |
| 2                   | GS_occipital_inf      | 19.72           | 21.65 | 7.63                  | 7.80  | 5.70                 | 5.54 |
| 3                   | GS_paracentral        | 14.01           | 15.32 | 7.36                  | 7.39  | 4.49                 | 4.48 |
| 4                   | GS_subcentral         | 15.14           | 15.43 | 6.79                  | 7.08  | 9.40                 | 7.60 |
| 6                   | GS_cingul-Ant         | 15.51           | 14.30 | 7.88                  | 7.02  | 5.02                 | 5.03 |
| 7                   | GS_cingul-Mid-Ant     | 16.38           | 15.90 | 7.34                  | 6.79  | 5.39                 | 5.19 |
| 8                   | GS_cingul-Mid-Post    | 13.46           | 16.44 | 5.99                  | 5.61  | 6.35                 | 5.82 |
| 9                   | G_cingul-Post-dorsal  | 24.61           | 23.71 | 6.22                  | 7.62  | 7.56                 | 7.66 |
| 10                  | G_cingul-Post-ventral | 24.88           | 21.34 | 10.98                 | 8.79  | 7.49                 | 7.47 |
| 11                  | G_cuneus              | 17.75           | 17.25 | 7.93                  | 7.44  | 6.80                 | 6.99 |
| 12                  | G_front_inf-Opercular | 17.73           | 18.24 | 6.04                  | 6.27  | 8.76                 | 7.84 |
| 14                  | G_front_inf-Triangul  | 21.97           | 23.96 | 6.83                  | 6.39  | 8.18                 | 8.25 |
| 15                  | G_front_middle        | 16.95           | 17.03 | 4.89                  | 5.27  | 5.09                 | 5.26 |
| 16                  | G_front_sup           | 12.68           | 11.59 | 5.04                  | 5.10  | 4.10                 | 4.05 |
| 17                  | G_ins_lgS_cent_ins    | 19.40           | 18.52 | 7.95                  | 9.08  | 11.00                | 8.70 |
| 18                  | G_insular_short       | 17.84           | 19.48 | 6.41                  | 6.26  | 10.06                | 8.91 |
| 19                  | G_occipital_middle    | 18.48           | 18.91 | 6.22                  | 5.63  | 5.58                 | 5.64 |
| 20                  | G_occipital_sup       | 14.72           | 15.80 | 8.26                  | 8.39  | 5.98                 | 5.64 |
| 21                  | G_oc-temp_lat-fusifor | 20.40           | 20.67 | 6.30                  | 6.57  | 4.40                 | 4.70 |
| 22                  | G_oc-temp_med-Lingual | 16.81           | 15.45 | 6.91                  | 7.26  | 6.08                 | 6.72 |
| 23                  | G_oc-temp_med-Parahip | 15.49           | 18.55 | 9.32                  | 7.78  | 4.69                 | 4.99 |
| 24                  | G_orbital             | 13.10           | 12.33 | 6.83                  | 6.49  | 5.23                 | 5.01 |
| 25                  | G_pariet_inf-Angular  | 17.71           | 18.21 | 6.33                  | 5.80  | 4.61                 | 4.93 |
| 26                  | G_pariet_inf-Supramar | 18.43           | 16.33 | 6.63                  | 5.54  | 5.05                 | 5.71 |
| 27                  | G_parietal_sup        | 15.67           | 15.64 | 6.70                  | 6.25  | 4.63                 | 5.19 |
| 28                  | G_postcentral         | 15.10           | 13.81 | 8.31                  | 7.17  | 4.35                 | 4.66 |
| 29                  | G_precentral          | 14.59           | 14.43 | 5.77                  | 6.26  | 4.56                 | 4.64 |
| 30                  | G_precuneus           | 18.22           | 16.36 | 5.96                  | 5.92  | 5.75                 | 6.10 |
| 31                  | G_rectus              | 11.46           | 13.05 | 8.29                  | 8.88  | 4.62                 | 4.87 |
| 33                  | G_temp_sup-G_T_transv | 19.85           | 20.88 | 9.00                  | 9.02  | 8.91                 | 7.83 |
| 34                  | G_temp_sup-Lateral    | 12.25           | 13.31 | 7.95                  | 6.19  | 8.61                 | 7.41 |
| 35                  | G_temp_sup-Plan_polar | 23.77           | 18.46 | 8.44                  | 7.79  | 11.91                | 8.29 |
| 36                  | G_temp_sup-Plan_tempo | 25.25           | 20.01 | 8.63                  | 8.35  | 6.92                 | 7.01 |
| 37                  | G_temporal_inf        | 16.91           | 17.80 | 5.68                  | 6.03  | 4.77                 | 5.12 |
| 38                  | G_temporal_middle     | 16.93           | 14.48 | 6.79                  | 5.28  | 7.00                 | 6.40 |
| 39                  | Lat_Fis-ant-Horizont  | 18.31           | 21.91 | 15.22                 | 10.28 | 9.16                 | 9.57 |
| 40                  | Lat_Fis-ant-Vertical  | 29.93           | 33.92 | 11.48                 | 13.13 | 9.35                 | 9.25 |
| 41                  | Lat_Fis-post          | 16.00           | 10.58 | 7.61                  | 6.35  | 7.28                 | 7.43 |
| 42                  | Pole_occipital        | 15.36           | 14.55 | 8.00                  | 7.43  | 5.73                 | 5.32 |
| 43                  | Pole_temporal         | 12.81           | 13.97 | 7.12                  | 7.42  | 5.86                 | 5.72 |
| 44                  | S_calcarine           | 18.93           | 18.55 | 7.50                  | 6.76  | 7.26                 | 8.00 |
| 45                  | S_central             | 12.02           | 11.93 | 6.37                  | 6.15  | 4.65                 | 4.71 |
| 46                  | S_cingul-Marginalis   | 13.29           | 15.35 | 7.71                  | 6.69  | 5.76                 | 6.29 |
| 47                  | S_circular_insula_ant | 17.54           | 16.60 | 8.15                  | 8.48  | 9.16                 | 8.18 |
| 48                  | S_circular_insula_inf | 11.72           | 13.22 | 7.08                  | 8.48  | 9.77                 | 8.46 |
| 49                  | S_circular_insula_sup | 11.22           | 13.25 | 5.17                  | 5.37  | 8.78                 | 8.15 |
| 50                  | S_collat_transv_ant   | 28.95           | 26.30 | 15.35                 | 13.76 | 4.76                 | 5.38 |
| 51                  | S_collat_transv_post  | 26.66           | 31.46 | 10.07                 | 9.15  | 5.29                 | 5.78 |
| 52                  | S_front_inf           | 20.42           | 19.75 | 6.14                  | 6.21  | 6.29                 | 6.45 |
| 53                  | S_front_middle        | 23.20           | 22.40 | 7.97                  | 6.70  | 6.59                 | 6.13 |
| 54                  | S_front_sup           | 15.59           | 16.14 | 5.34                  | 6.08  | 5.44                 | 5.45 |
| 56                  | S_intraparietP_trans  | 13.87           | 14.88 | 6.66                  | 6.69  | 4.69                 | 5.22 |
| 57                  | S_oc_middleLunatus    | 26.85           | 30.02 | 9.10                  | 9.22  | 6.66                 | 6.84 |
| 58                  | S_oc_suptransversal   | 20.91           | 20.40 | 6.91                  | 7.99  | 6.21                 | 5.79 |
| 60                  | S_oc-temp_lat         | 23.83           | 25.21 | 8.58                  | 7.71  | 5.36                 | 5.01 |
| 61                  | S_oc-temp_medLingual  | 16.82           | 15.75 | 8.65                  | 7.92  | 5.22                 | 5.54 |
| 62                  | S_orbital_lateral     | 26.57           | 30.31 | 13.76                 | 12.98 | 7.57                 | 7.89 |
| 63                  | S_orbital_med-olfact  | 19.74           | 17.96 | 12.70                 | 10.79 | 4.69                 | 4.82 |
| 64                  | S_orbital-H_Shaped    | 16.81           | 17.25 | 9.48                  | 8.35  | 6.19                 | 5.78 |
| 65                  | S_parieto_occipital   | 17.14           | 19.13 | 6.75                  | 6.53  | 6.97                 | 6.94 |
| 66                  | S_pericallosal        | 20.24           | 17.93 | 10.93                 | 10.68 | 5.93                 | 5.62 |
| 67                  | S_postcentral         | 14.80           | 17.27 | 7.39                  | 7.57  | 4.33                 | 5.00 |
| 68                  | S_precentral-inf-part | 20.35           | 20.28 | 6.54                  | 5.95  | 6.54                 | 6.07 |
| 69                  | S_precentral-sup-part | 20.96           | 17.85 | 6.74                  | 6.17  | 5.26                 | 5.65 |
| 71                  | S_subparietal         | 25.64           | 29.55 | 7.66                  | 8.19  | 7.70                 | 8.29 |
| 72                  | S_temporal_inf        | 28.59           | 27.49 | 9.13                  | 7.78  | 5.64                 | 6.39 |
| 73                  | S_temporal_sup        | 14.56           | 14.02 | 4.92                  | 4.54  | 6.30                 | 6.34 |
| 74                  | S_temporal_transverse | 22.60           | 23.28 | 14.44                 | 12.43 | 9.36                 | 8.05 |
